# Supplementary material for: Circular RNA_LARP4 inhibits cell proliferation and invasion of gastric cancer by sponging miR-424-5p and regulating LATS1 expression
Source: Springer Nature journal article supplement (doi:10.1186/s12943-017-0719-3), 2017-09-11

**a** EXPRESSION as negative marker for status

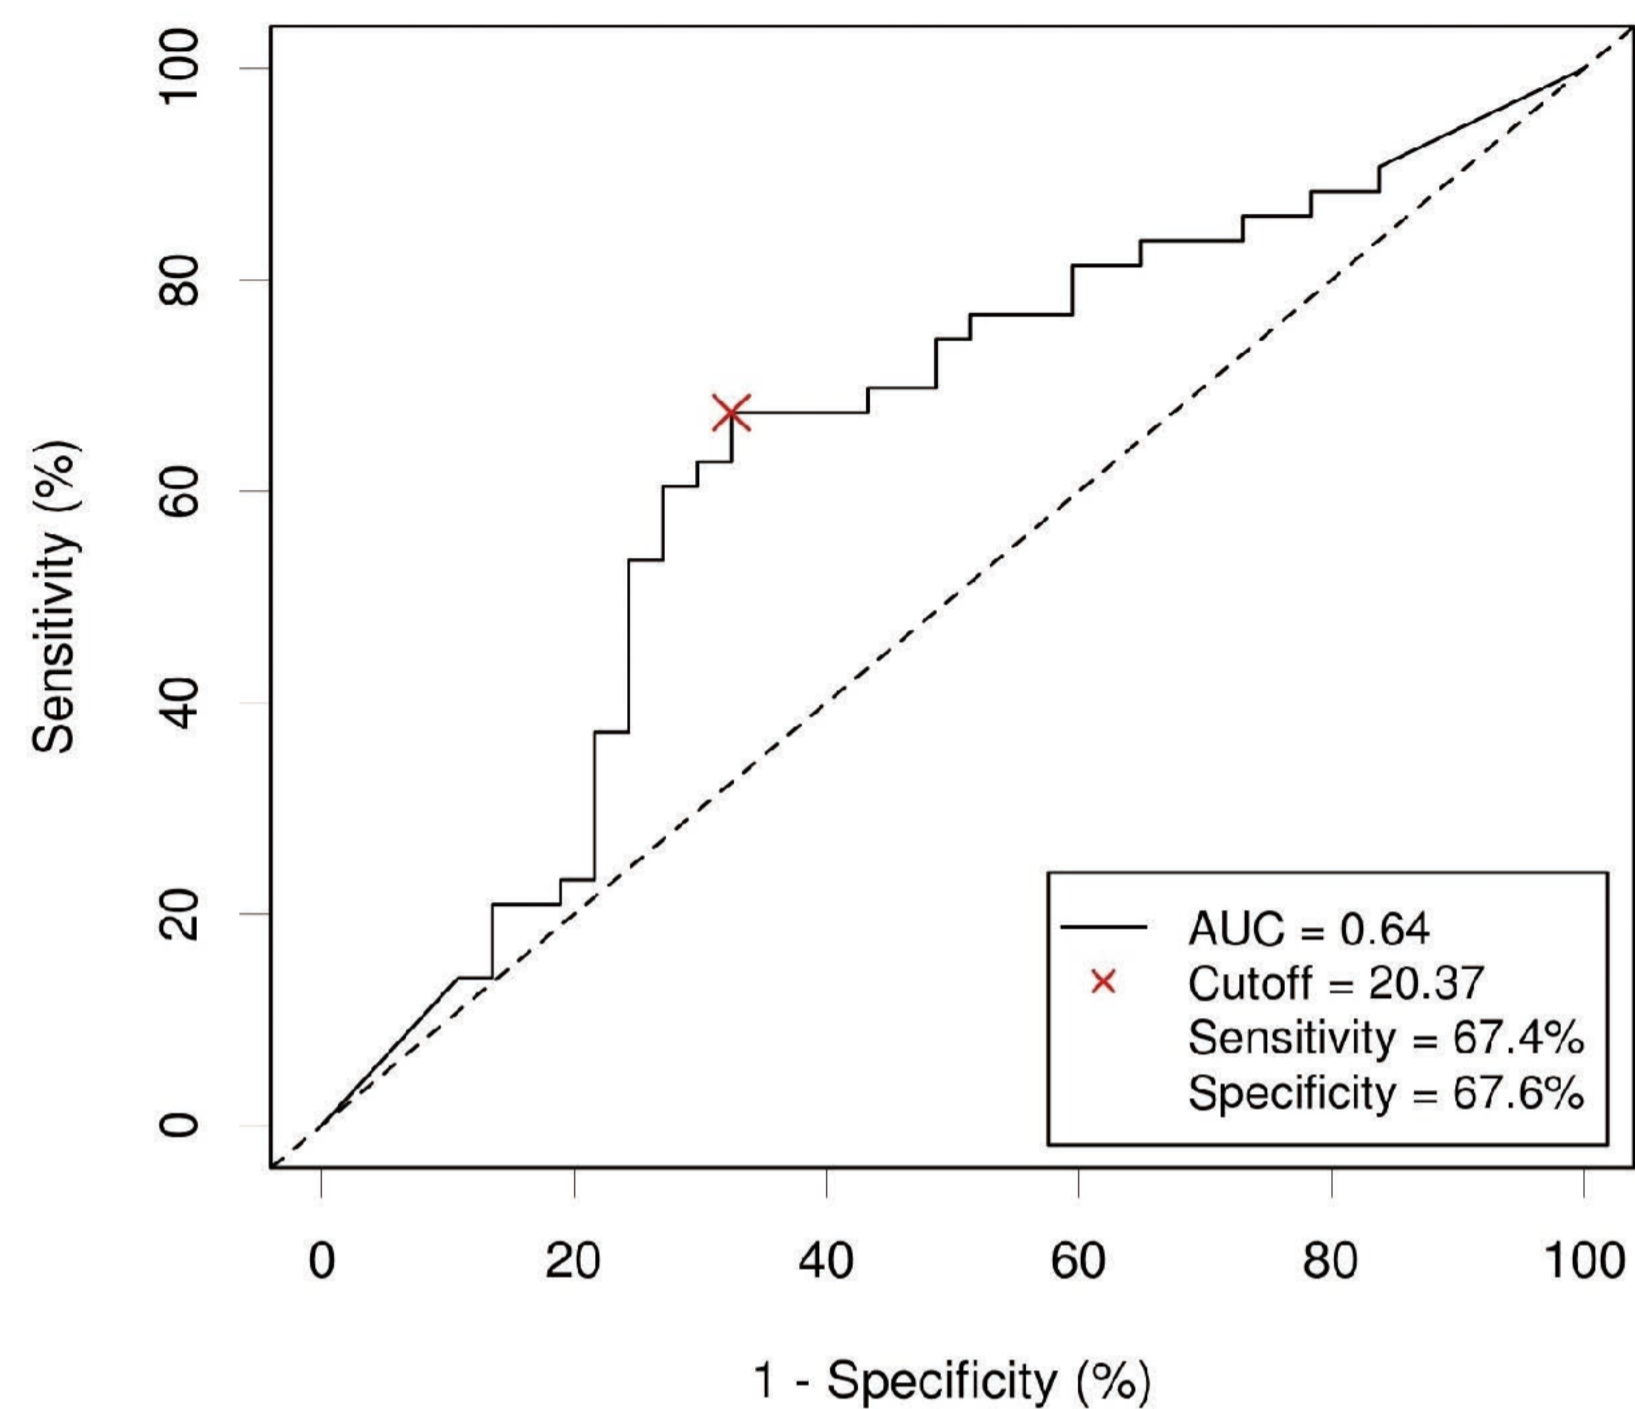

**b**

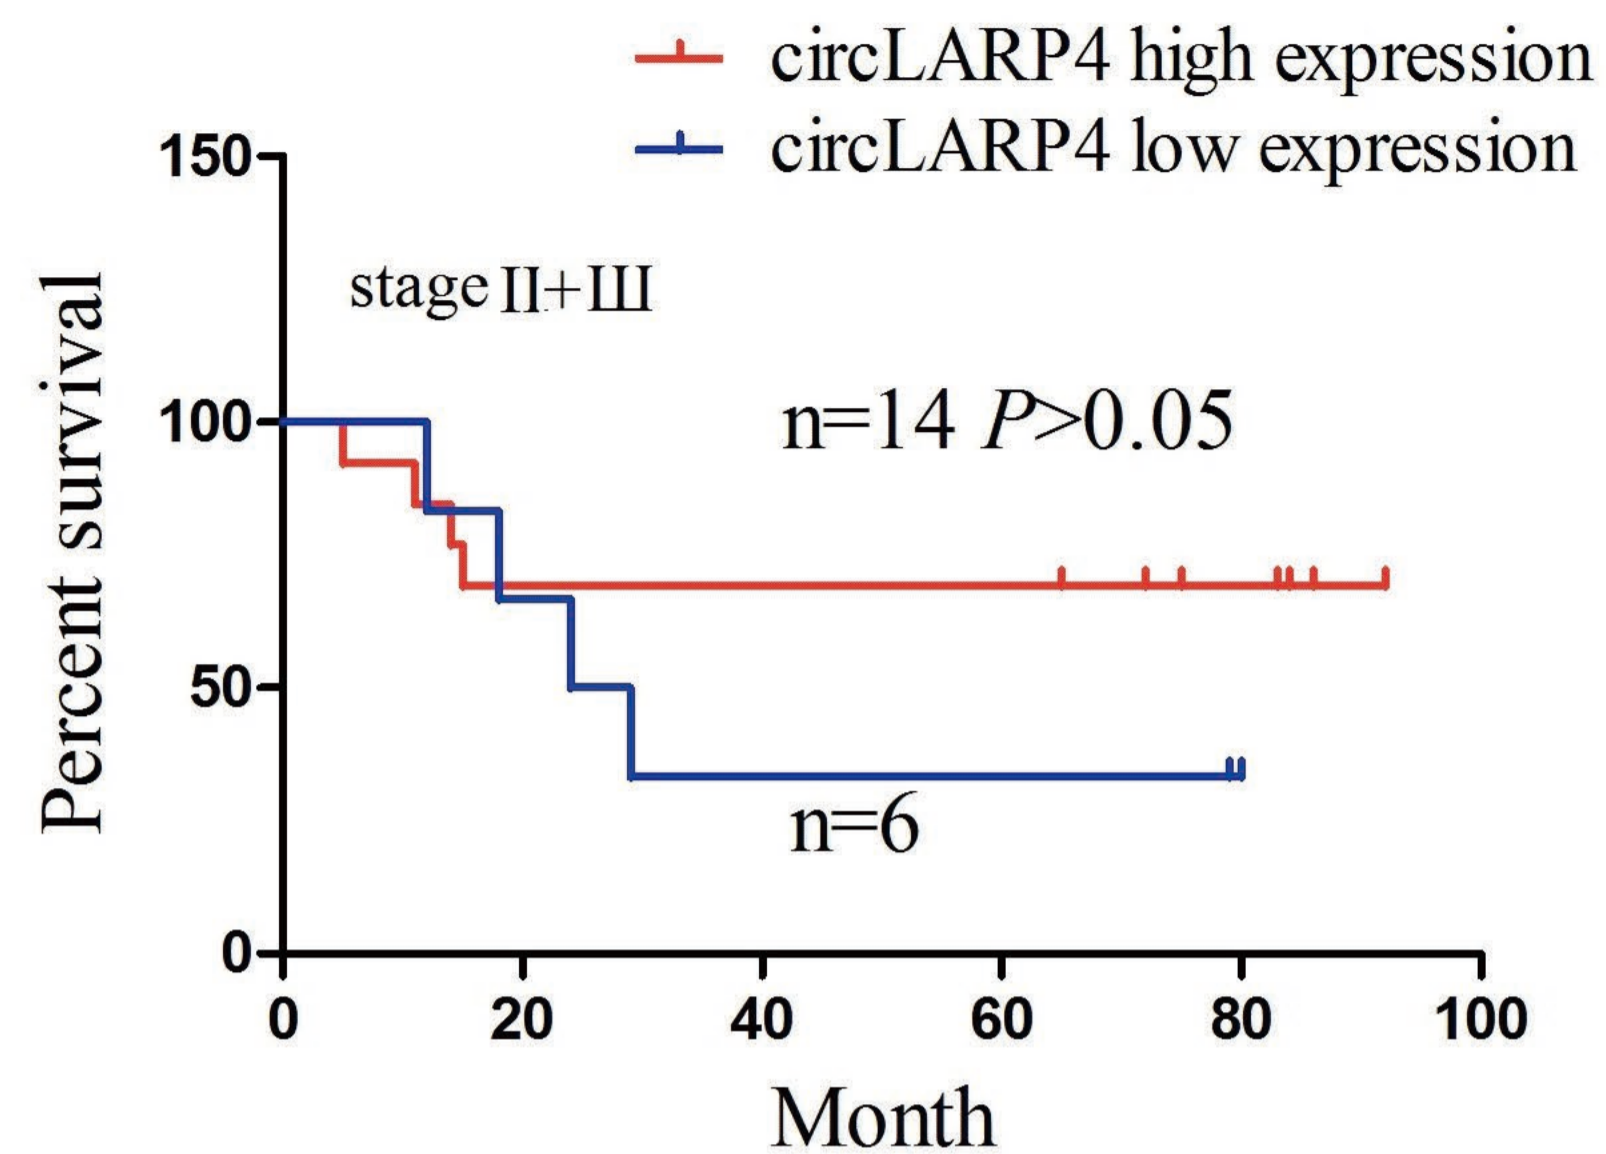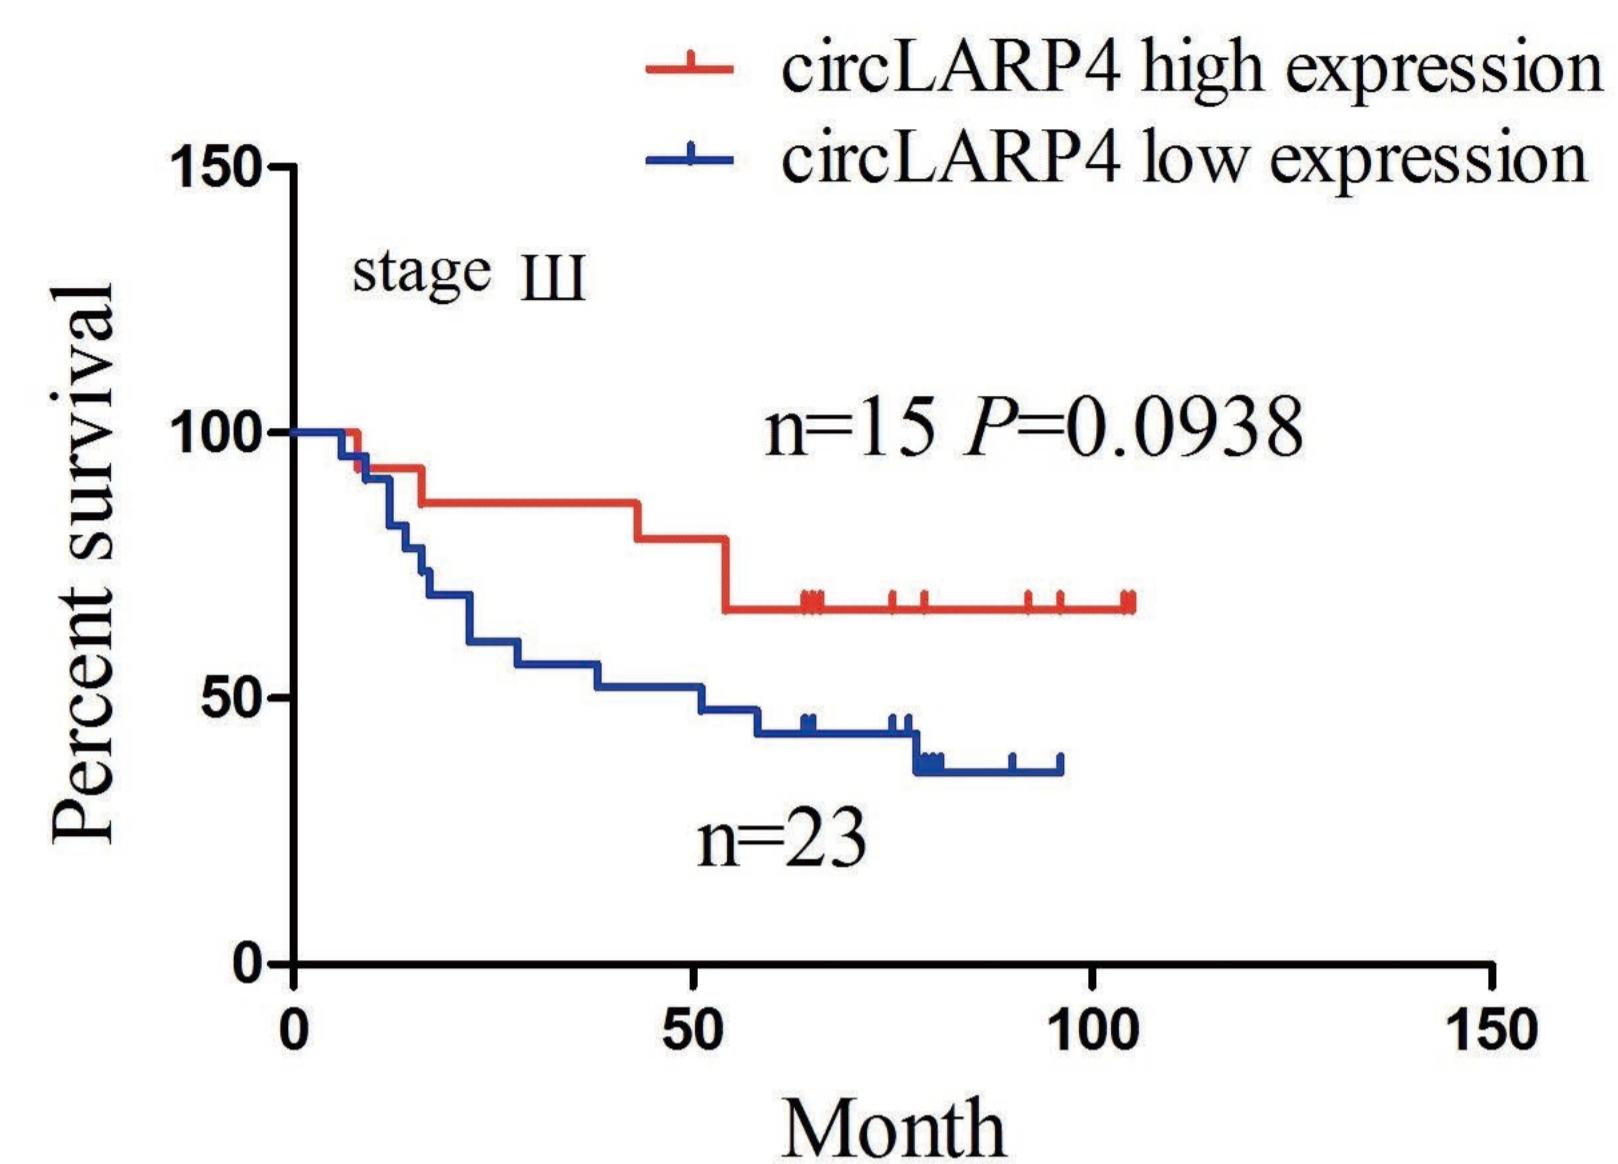

**c**

—+ circLARP4 high expression  
—+ circLARP4 low expression

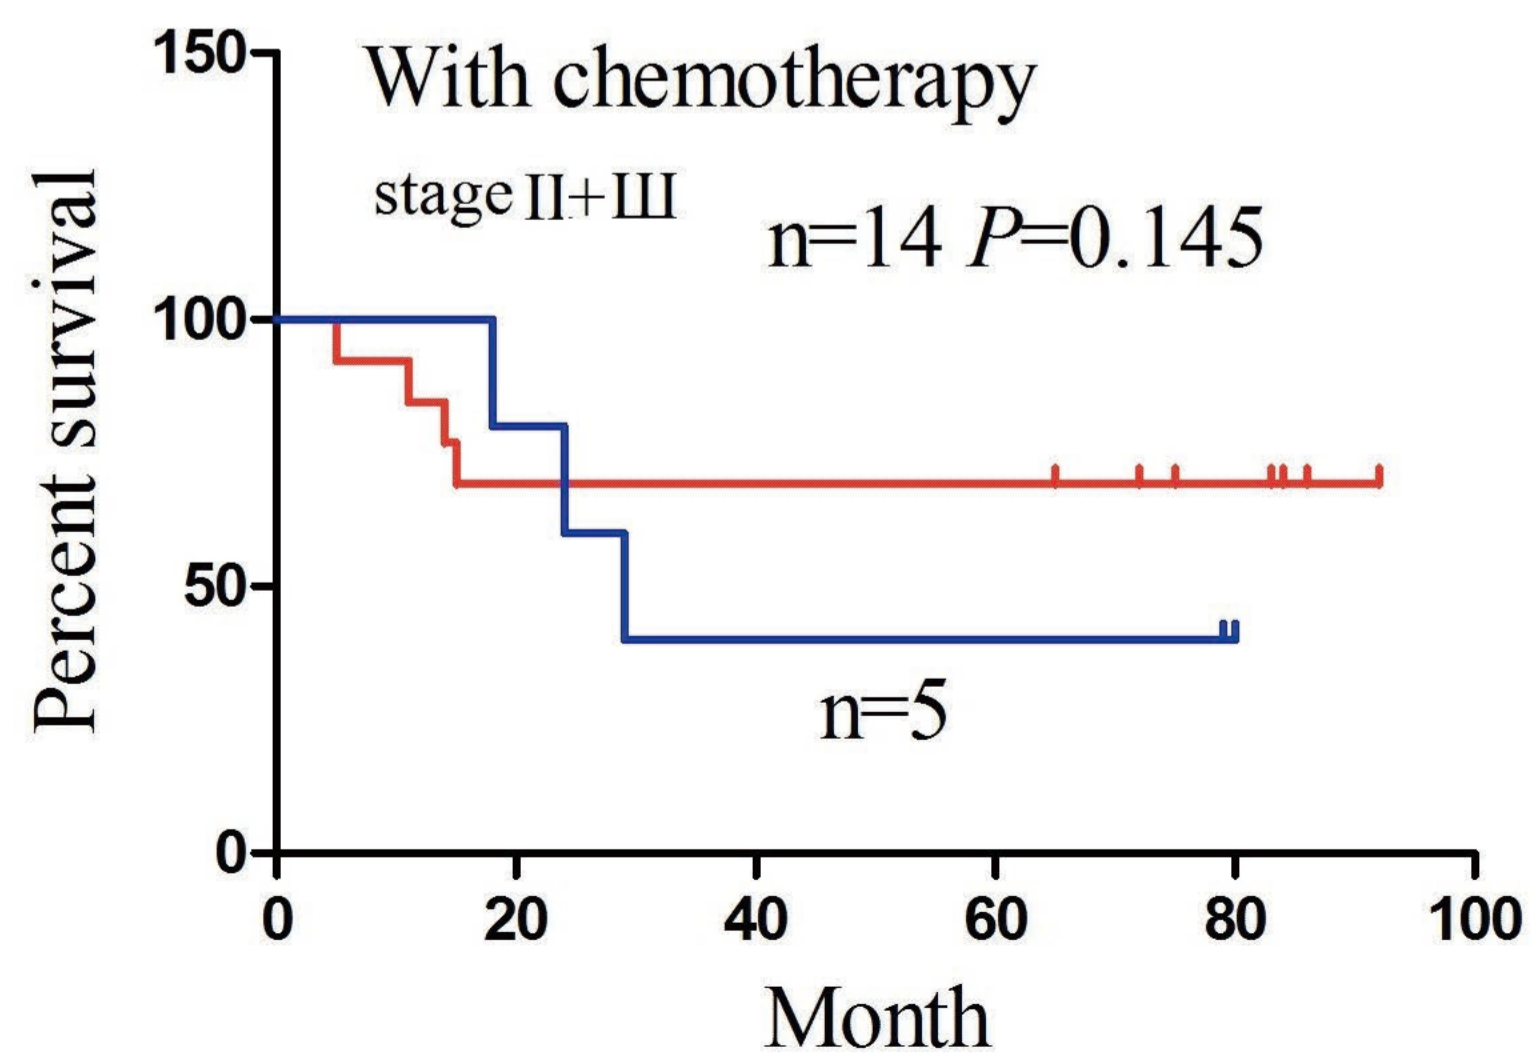

—+ circLARP4 high expression  
—+ circLARP4 low expression

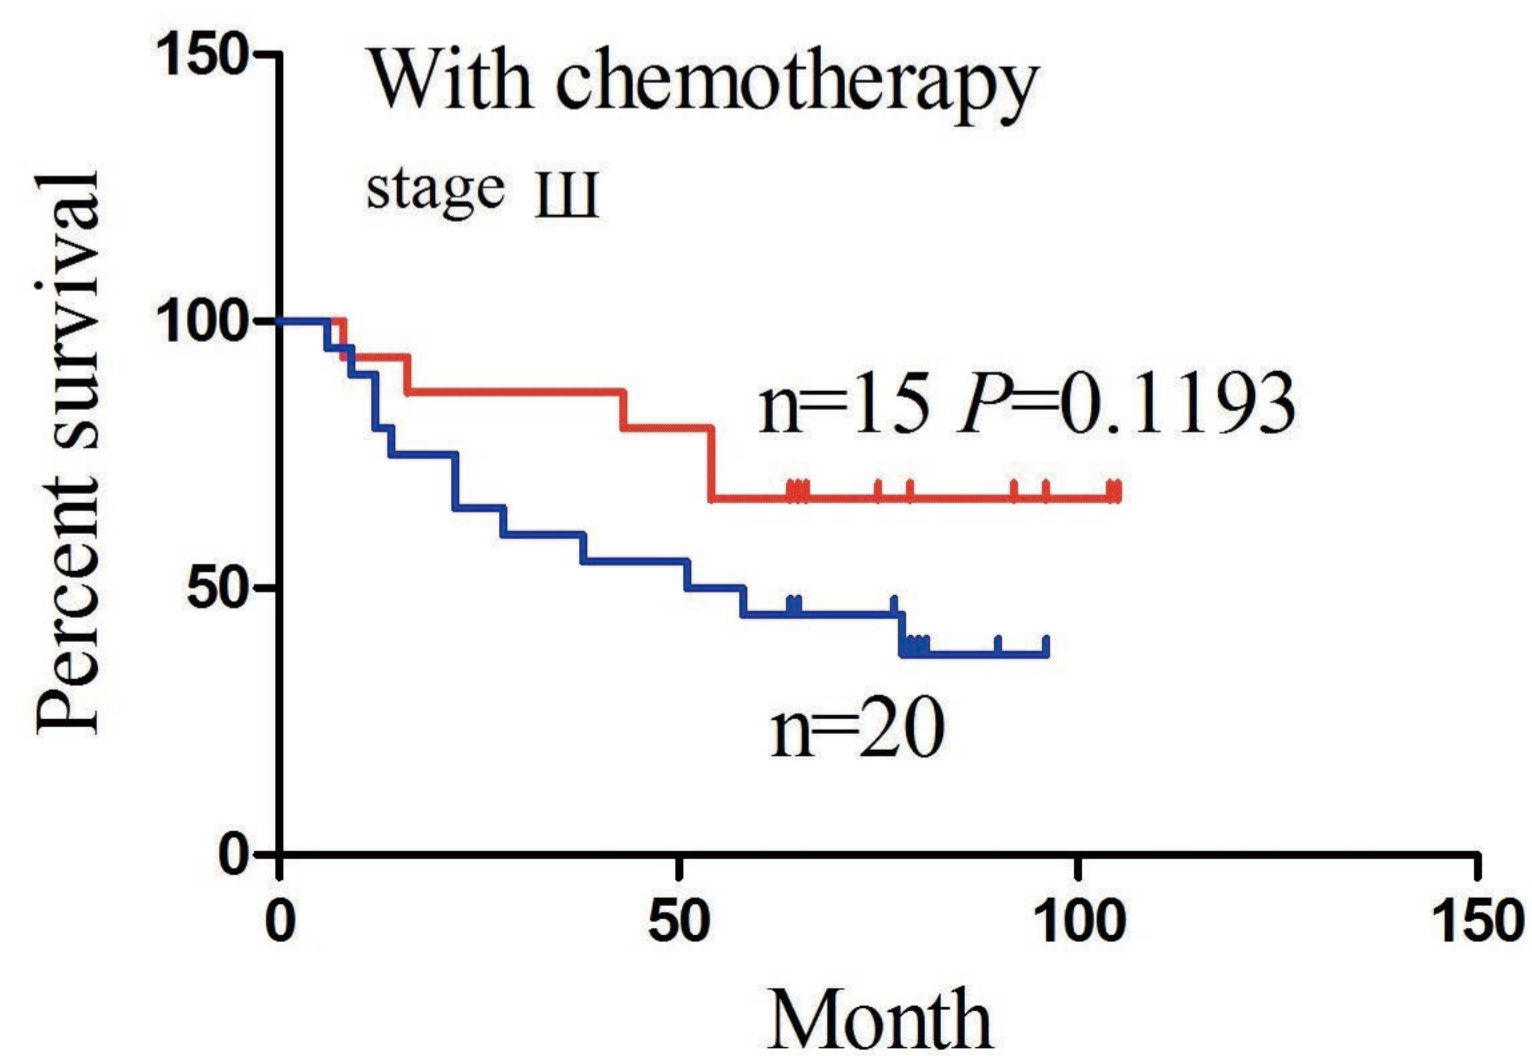

**d**

—+ circLARP4 high expression  
—+ circLARP4 low expression

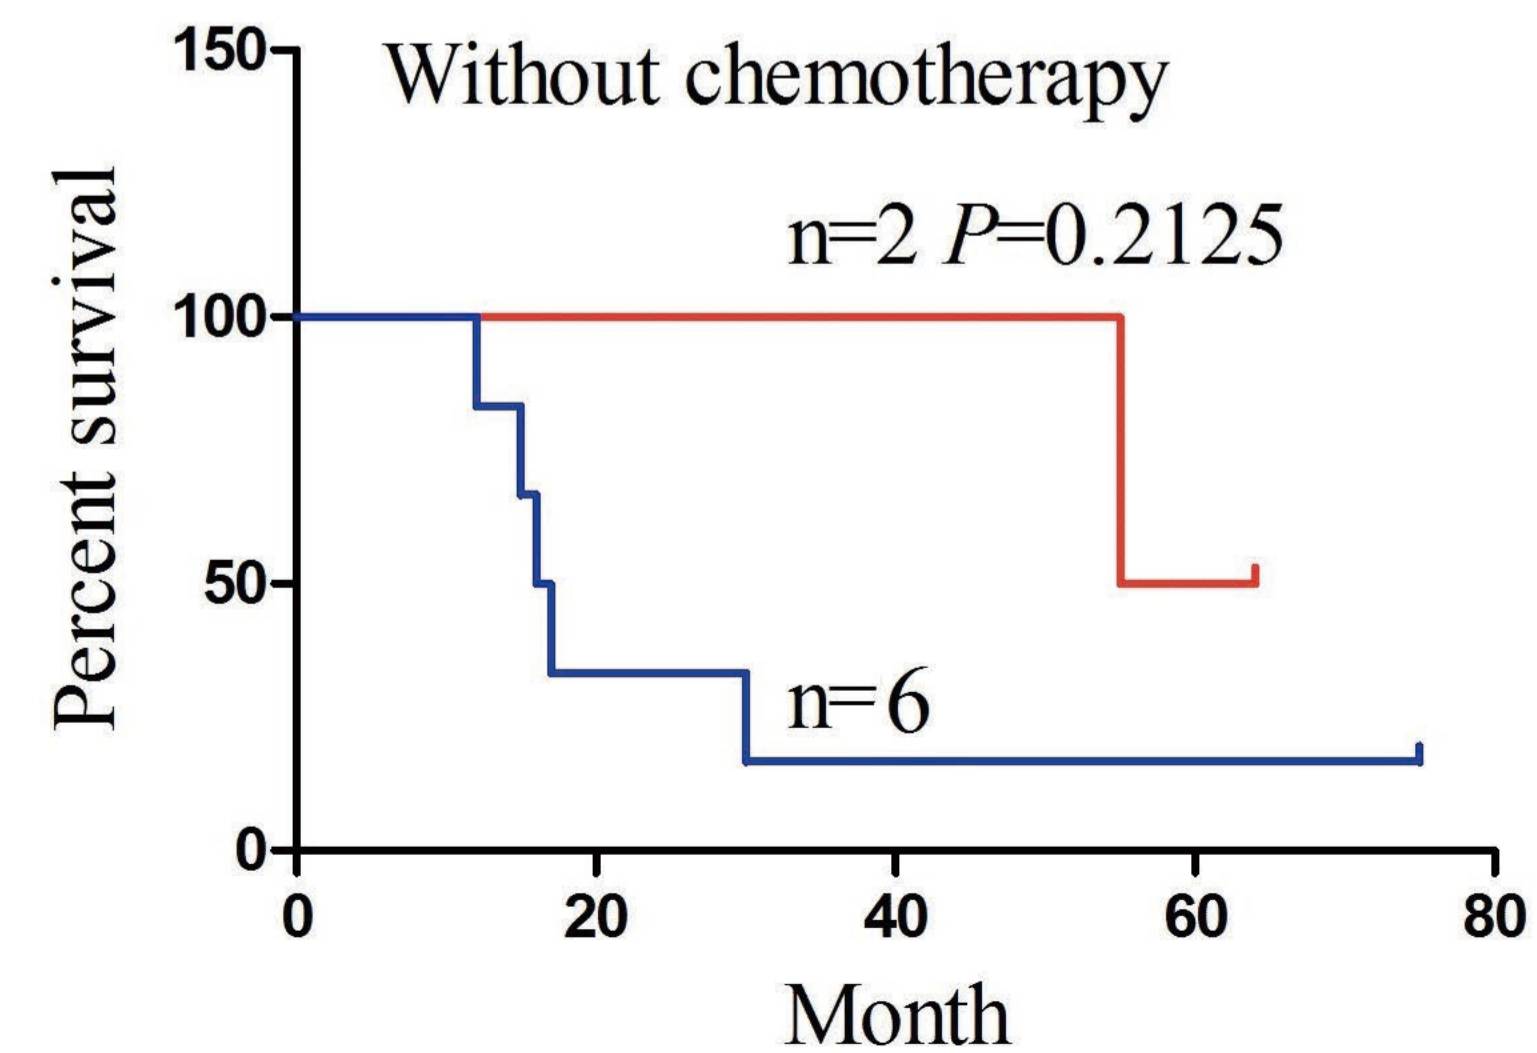

Supplement: MOESM6 [file 15036616]
